# Supplementary material for: Analysis of Bos taurus and Sus scrofa X and Y chromosome transcriptome highlights reproductive driver genes
Source: PubMed Central journal article supplement (PMC5589591; doi:10.18632/oncotarget.17081), 2017-04-13
Supplement: oncotarget-08-54416-s001.pdf [file oncotarget-08-54416-s001.pdf]

# Analysis of *Bos taurus* and *Sus scrofa* X and Y chromosome transcriptome highlights reproductive driver genes

## SUPPLEMENTARY FIGURE AND TABLES

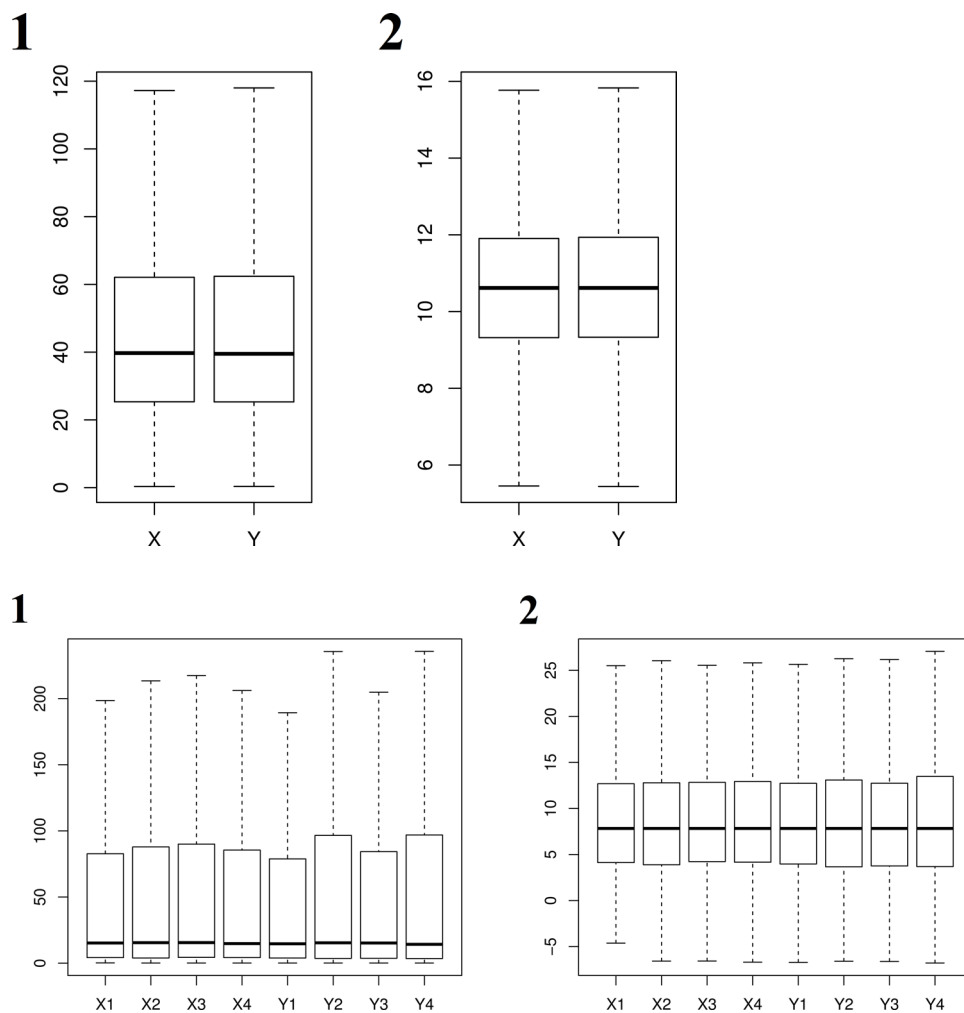

Supplementary Figure 1: Expression data before and after normalization of *Bos taurus* X and Y spermatozoa (Supplementary Figure 1A) *Sus scrofa* GSE47139 (Supplementary Figure 1B).

**Supplementary Table 1: Expression data before and after normalization**

See Supplementary File 1

**Supplementary Table 2: Shared homologous gene list of *Bos taurus* and *Sus scrofa* in expression data**

See Supplementary File 2

**Supplementary Table 3: Corresponding genes and their module color in *Bos taurus* and *Sus scrofa***

See Supplementary File 3

**Supplementary Table 4: Gene list of significantly overlapped genes in consensus modules**

See Supplementary File 4

**Supplementary Table 5: Differentially expressed genes (DEGs) in *Bos taurus***

See Supplementary File 5

**Supplementary Table 6: The dual featured expressed gene list in X and Y transcriptome**

See Supplementary File 6

**Supplementary Table 7: Correlation coefficient matrix of selected genes**

See Supplementary File 7

**Supplementary Table 8: Complete list of GO annotations**

See Supplementary File 8

**Supplementary Table 9: miRNA list targeted genes in co-expression network**

|      |            |               |            |
|------|------------|---------------|------------|
| SCD  | MIRT053989 | bta-miR-181a  | Bos taurus |
| LDLR | MIRT053868 | bta-miR-17-5p | Bos taurus |
| LDLR | MIRT053942 | bta-miR-146b  | Bos taurus |
| LDLR | MIRT053926 | bta-miR-146a  | Bos taurus |
| PLAU | MIRT053969 | bta-miR-181a  | Bos taurus |

**Supplementary Table 10: Sequences of PPP2R2B, PRM1 and PFAH1B1 in *Bos taurus* and *Sus scrofa***>PPP2R2B-*Bos taurus*

MEEDIDTRKINNSFLRDHSYATEADIISTVEFNHTGELLATGDKGGRVVIFQREQESKNQVHRRGEYNVYSTFQSH  
EPEFDYLSLEIEEKINKIRWLPQQNAAYFLLSTNDKTVKLVKVSERDKRPEGYNLKDEEGRLRDPATITTLRVPV  
LRPMDLMVEATPRRVFANAHTYHINSISVNSDYETYMSADDLRINLWNFEITNQSFNIVDIK PANMEELTEVITAA  
EFHPPHCNTFVYSSSKGTIRLCDMRASALCDRHTKFFEEPEDPSNRSFFSEIISISDVKFSHSGRYIMTRDYLTVKV  
WDLNMENRPIETYQVVDYLRSKLCSLYENDCIFDKFECVWNGSDSVIMTGSYNNFFRMFDRNTKRDTVLEASRE  
NSKPRAILKPRKVCVGGKRRKDEISVDSLDFSKILHTAWHPSENIIVAATNNLYIFQDKVN

>PRM1-*Bos taurus*

MARYRCLTHSGSRCCCCRRRRRRRCRRRRRRFRGRRRRRRVCCRRYTVIRCTRQ

>PFAH1B1-*Bos taurus*

MVLSQRQRDELNRAIADYLRNNGYEEAYSVFKKEAELDMNEELD KKYAGLLEKKWTSVIRLQKKVMELESKLN  
EAKKEEFTSGGPLGQKRPKEWIPRPEKYALSGHRSPVTRVIFHPVFSVMVSASEDATIKVWDYETGDFERTLKG  
HTDSVQDISFDHSGKLLASCSADMTIKLWDFQGFCIRTMHGHHDHNVSSVAIMPNGDHIVSASRDKTIKMWEVQ  
TG YCVKTFTGHREWVRMVRPNQDGTLIASCSNDQTVRVWV VVATKECKAELREHEHVVECISWAPESYSSISEAT  
GSETKKS GKPGPFLLSGSRDKTIKMWDVSTGMCLMTLVGHDNWVRGVLFHSGGKFILSCADDKTLRVWDYKN  
KRCMKT LNAHEHFVTSLDFHKTAPYVVTGSVDQTVK VWECR

>PFAH1B1-*Sus scrofa*

MVLSQRQRDELNRAIADYLRNNGYEEAYSVFKKEAELDMNEELD KKYAGLLEKKWTSVIRLQKKVMELESKLN  
EAKKEEFTSGGPLGQKRPKEWIPRPEKYALSGHRSPVTRVIFHPVFSVMVSASEDATIKVWDYETGDFERTLKG  
HTDSVQDISFDHSGKLLASCSADMTIKLWDFQGFCIRTMHGHHDHNVSSVAIMPNGDHIVSASRDKTIKMWEVQ  
TG YCVKTFTGHREWVRMVRPNQDGTLIASCSNDQTVRVWV VVATKECKAELREHEHVVECISWAPESYSSISEAT  
GSETKKS GKPGPFLLSGSRDKTIKMWDVSTGMCLMTLVGHDNWVRGVLFHSGGKFILSCADDKTLRVWDYKN  
KRCMKT LNAHEHFVTSLDFHKTAPYVVTGSVDQTVK VWECR

>PRM1-*Sus scrofa*

MARYRCCRSHSRRCRPRRRRCRRRRRRCCPRRRRAVCCRRYTVIRCRRC

>PPP2R2B-*Sus scrofa*

MEEDIDTRKINNSFLRDHSYATEADIISAVEFNHTGELLATGDKGGRVVIFQREQESKNQVHRRGEYNVYSTFQSH  
EPEFDYLSLEIEEKINKIRWLPQQNAAYFLLSTNDKTVKLVKVSERDKRPEGYNLKDEEGRLRDPATITTLRVPV  
LRPMDLMVEATPRRVFANAHTYHINSISVNSDYETYMSADDLRINLWNFEITNQSFNIVDIK PANMEELTEVITAA  
EFHPPHCNTFVYSSSKGTIRLCDMRASCVTGTNPFEEPEPDPNRSFFSEIISISDVKFSHSGRYIMTRDYLTVKV  
WDLNMENRPIETYQVSVFLRGKLI SLHIKNCMI AKDDARVDGSDSVIMTGSYNNFFRMFDRNTKRDTVLEASR  
ENSKPRAILKPRKVCVGGKRRKDEISVDSLDFSKILHTAWHPSENIIVAATNNLYIFQDKVN
